# Supplementary material for: Influenza A virus infection impacts systemic microbiota dynamics and causes quantitative enteric dysbiosis
Source: PubMed Central journal article supplement (PMC5763955; doi:10.1186/s40168-017-0386-z), 2018-01-10
Supplement: 40168_2017_386_MOESM7_ESM.pdf [file 40168_2017_386_MOESM7_ESM.pdf]

**Figure S3**

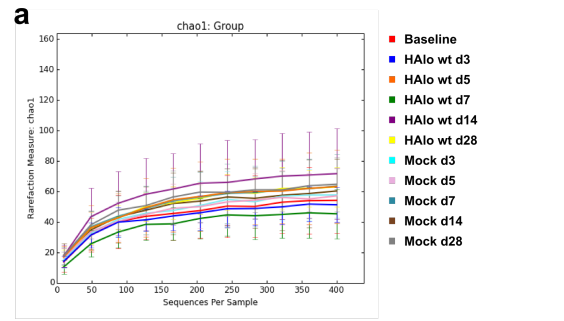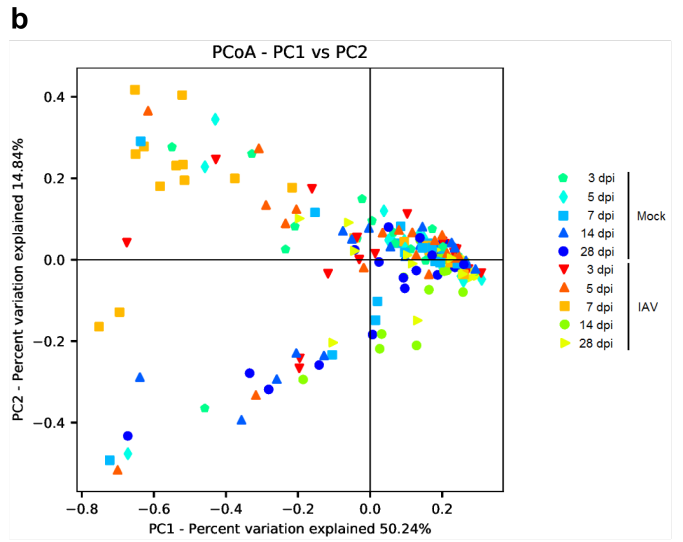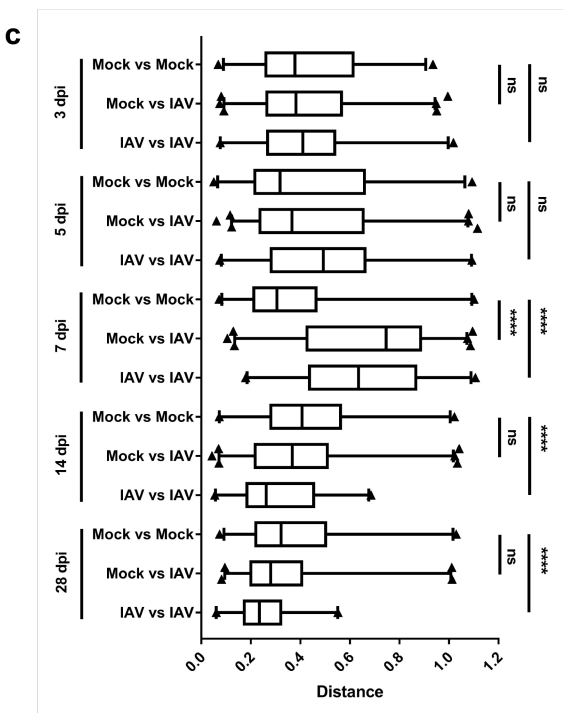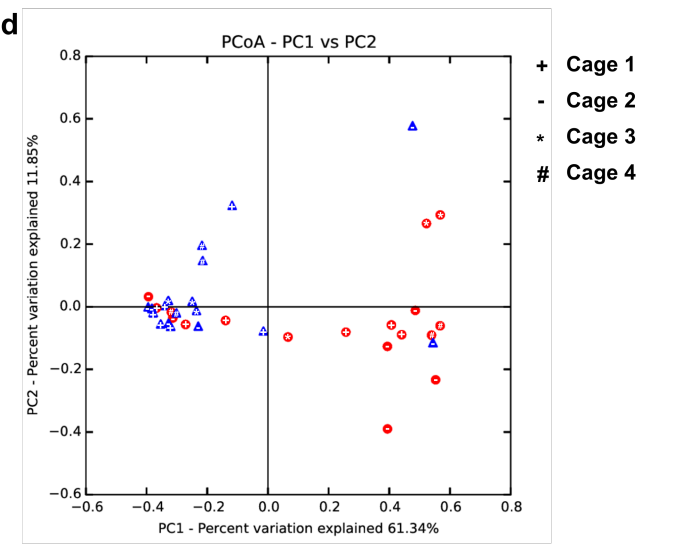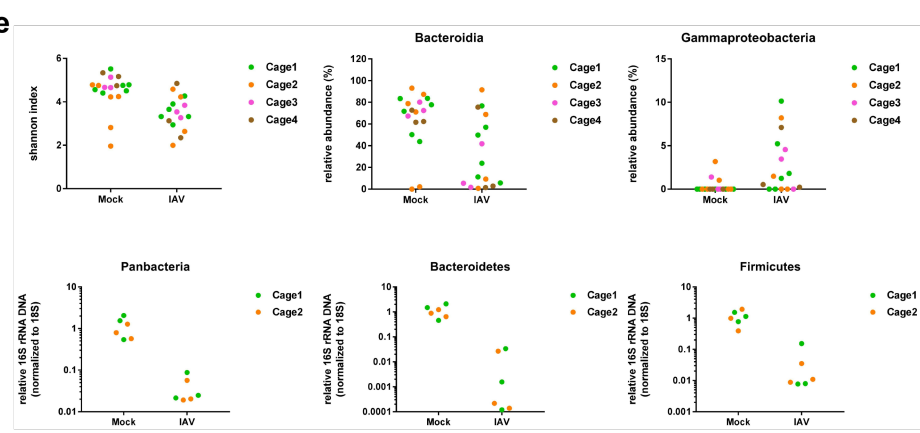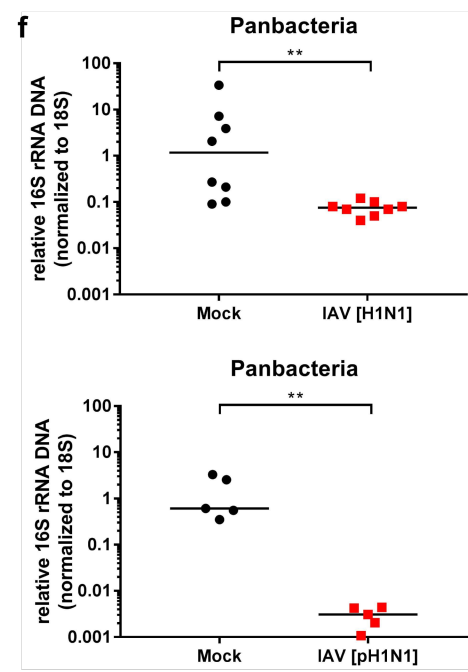

**g**

| OTU ID                                                                                                     | Baseline   | Mock     | H5N1     |
|------------------------------------------------------------------------------------------------------------|------------|----------|----------|
| k_Bacteria;p_Bacteroidetes;c_Bacteroidia;o_Bacteroidales;f_S24-7;g                                         | 59.1716683 | 71.42983 | 17.54856 |
| k_Bacteria;p_Firmicutes;c_Bacilli;o_Lactobacillales;f_Lactobacillaceae;g_Lactobacillus                     | 3.64771899 | 5.362184 | 13.68197 |
| k_Bacteria;p_Proteobacteria;c_Betaproteobacteria;o_Burkholderiales;f_Alcigenaceae;g_Sutterella             | 1.05328959 | 2.619782 | 0.430352 |
| k_Bacteria;p_Firmicutes;c_Erysipelotrichia;o_Erysipelotrichales;f_Erysipelotrichaceae;g_Allobaculum        | 2.13071212 | 2.431486 | 2.199741 |
| k_Bacteria;p_Firmicutes;c_Clostridia;o_Clostridiales;f_g                                                   | 1.30064309 | 1.743752 | 0.685818 |
| k_Bacteria;p_Firmicutes;c_Clostridia;o_Clostridiales;f_Lachnospiraceae;g                                   | 0.11643477 | 0.905625 | 0.422549 |
| k_Bacteria;p_Proteobacteria;c_Deltaproteobacteria;o_Desulfobiontales;f_Desulfobiontaceae;g_Bilophila       | 0.39595605 | 0.558605 | 0        |
| k_Bacteria;p_Firmicutes;c_Clostridia;o_Clostridiales;f_Lachnospiraceae;g_Ruminococcus                      | 0.11106091 | 0.293349 | 0.238171 |
| k_Bacteria;p_Cyanobacteria;c_Chloroplasta;o_Streptophyta;f_g                                               | 0.47595177 | 0.212014 | 0.059127 |
| k_Bacteria;p_Firmicutes;c_Clostridia;o_Clostridiales;f_Ruminococcaceae;g                                   | 0          | 0.118577 | 0        |
| k_Bacteria;p_Firmicutes;c_Bacilli;o_Lactobacillales;f_Streptococcaceae;g_Streptococcus                     | 0.21923968 | 0        | 0.681582 |
| k_Bacteria;p_Firmicutes;c_Clostridia;o_Clostridiales;f_Ruminococcaceae;g_Oscillospira                      | 0          | 0        | 0.17083  |
| k_Bacteria;p_Proteobacteria;c_Alphaproteobacteria;o_Rickettsiales;f_mitochondria;g_Victoria                | 0.27401833 | 0        | 0        |
| k_Bacteria;p_Verrucomicrobia;c_Verrucomicrobiales;o_Verrucomicrobiales;f_Verrucomicrobiaceae;g_Akkermansia | 0          | 0        | 0        |
