# Supplementary material for: Influenza A virus infection impacts systemic microbiota dynamics and causes quantitative enteric dysbiosis
Source: PubMed Central journal article supplement (PMC5763955; doi:10.1186/s40168-017-0386-z), 2018-01-10

**Figure S4**

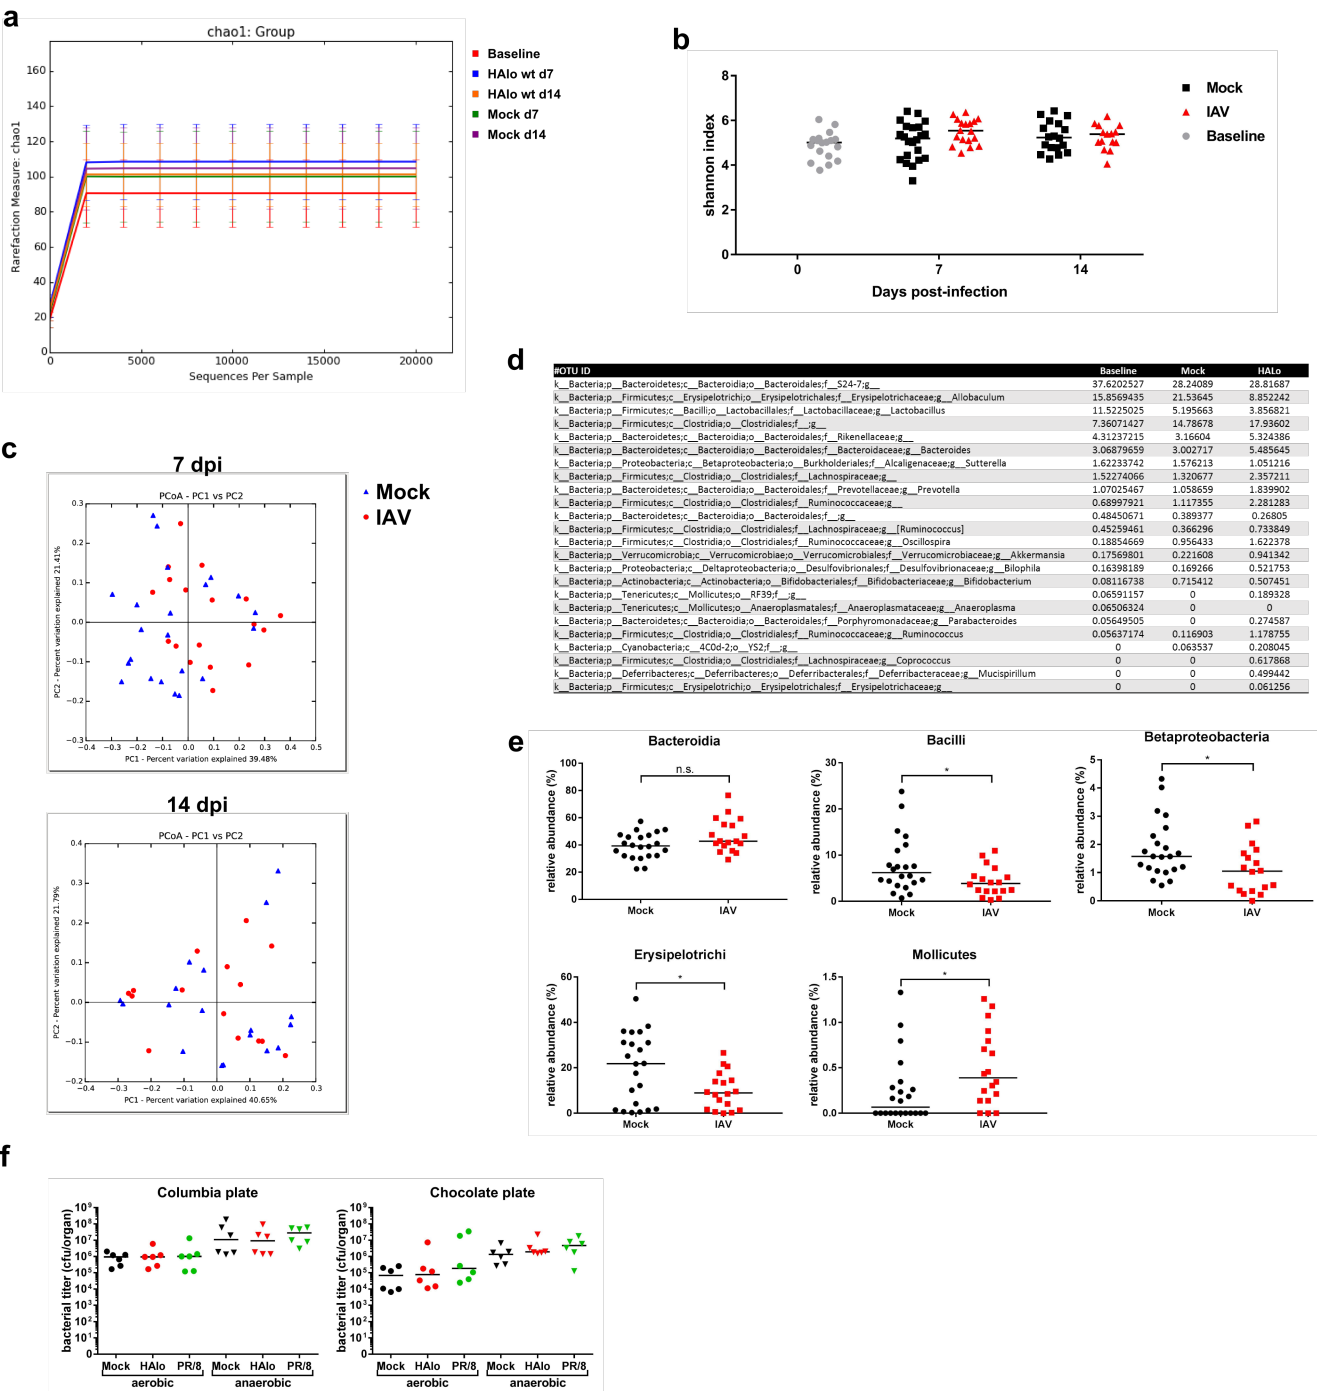

Supplement: 40168_2017_386_MOESM9_ESM.pdf [file 40168_2017_386_MOESM9_ESM.pdf]
